# Supplementary material
Source: publisher figshare collection journal article supplement (https://gsajournals.figshare.com/ndownloader/files/13477397)
Supplement: Supplementary file 1 [file 13477397]

## Sheet: Sheet1
Assemblies	# of Contigs	total size	Contig N50	Genome fraction (%)	Duplication ratio	Mapped (%)*	Properly paired (%)	Coverage >10X (%)	# of total misassemblies	# of local misassemblies	Mismatches per 100 kb	Indels per 100 kb
Merged3	276	154861228	19478218	97.354	1.074	97.89	94.57	99.67	2181	1000	86.45	28.76
ISO_merged	767	149071519	21492213	93.945	1.078	97.43	93.69	99.37	1048	614	61.61	36.93
Merged4	257	156459669	21690032	97.128	1.085	97.89	94.61	99.64	2276	1133	97.81	36.99
Canu1	315	153747292	21454282	96.712	1.072	97.85	94.66	99.5	2225	1300	104.5	67.89
Final Merged	229	157163587	21690032	96.709	1.09	97.69	94.43	99.52	2445	1213	102.03	36.69
Corrected and Polished Final Merged	200	155584505	21691270	97.005	1.082	97.9	94.73	99.62	2408	1346	110.88	17.54
* including both Illumina and Pacbio reads
